# Supplementary material for: Discoidin-domain receptor coordinates cell-matrix adhesion and collective polarity in migratory cardiopharyngeal progenitors
Source: PubMed Central journal article supplement (PMC6320373; doi:10.1038/s41467-018-07976-3), 2019-01-04
Supplement: 41467_2018_7976_MOESM3_ESM.pdf [file 41467_2018_7976_MOESM3_ESM.pdf]

## Supplementary Movie Legends

Supplementary Movie 1. Tracking of TVC migration in control conditions. Epidermis is marked with *EfnB1>hCD4::mCh*, TVC nuclei are marked with *Mesp>H2B::GFP*. Temporal step = 3.4 minutes.

Supplementary Movie 2. Tracking of TVC migration under *Ddr<sup>dn</sup>* conditions. Epidermis is marked with *EfnB1>hCD4::mCh*, TVC nuclei are marked with *Mesp>H2B::GFP*. Temporal step = 3.4 minutes

Supplementary Movie 3. Tracking of TVC migration under *Vegfr<sup>dn</sup>* conditions. Epidermis is marked with *EfnB1>hCD4::mCh*, TVC nuclei are marked with *Mesp>H2B::GFP*. Temporal step = 3.4 minutes

Supplementary Movie 4. Tracking of TVC migration under *Fgfr<sup>dn</sup>* conditions. Epidermis is marked with *EfnB1>hCD4::mCh*, TVC nuclei are marked with *Mesp>H2B::GFP*. Temporal step = 3.4 minutes

Supplementary Movie 5. Tracking of TVC migration under *Egfr<sup>dn</sup>* conditions. Epidermis is marked with *EfnB1>hCD4::mCh*, TVC nuclei are marked with *Mesp>H2B::GFP*. Temporal step = 3.4 minutes
