# Supplementary material for: Discoidin-domain receptor coordinates cell-matrix adhesion and collective polarity in migratory cardiopharyngeal progenitors
Source: PubMed Central journal article supplement (PMC6320373; doi:10.1038/s41467-018-07976-3), 2019-01-04
Supplement: 41467_2018_7976_MOESM9_ESM.pdf [file 41467_2018_7976_MOESM9_ESM.pdf]

## Reporting Summary

Nature Research wishes to improve the reproducibility of the work that we publish. This form provides structure for consistency and transparency in reporting. For further information on Nature Research policies, see [Authors & Referees](#) and the [Editorial Policy Checklist](#).

### Statistical parameters

When statistical analyses are reported, confirm that the following items are present in the relevant location (e.g. figure legend, table legend, main text, or Methods section).

n/a Confirmed

- The exact sample size ( $n$ ) for each experimental group/condition, given as a discrete number and unit of measurement
- An indication of whether measurements were taken from distinct samples or whether the same sample was measured repeatedly
- The statistical test(s) used AND whether they are one- or two-sided  
*Only common tests should be described solely by name; describe more complex techniques in the Methods section.*
- A description of all covariates tested
- A description of any assumptions or corrections, such as tests of normality and adjustment for multiple comparisons
- A full description of the statistics including central tendency (e.g. means) or other basic estimates (e.g. regression coefficient) AND variation (e.g. standard deviation) or associated estimates of uncertainty (e.g. confidence intervals)
- For null hypothesis testing, the test statistic (e.g.  $F$ ,  $t$ ,  $r$ ) with confidence intervals, effect sizes, degrees of freedom and  $P$  value noted  
*Give  $P$  values as exact values whenever suitable.*
- For Bayesian analysis, information on the choice of priors and Markov chain Monte Carlo settings
- For hierarchical and complex designs, identification of the appropriate level for tests and full reporting of outcomes
- Estimates of effect sizes (e.g. Cohen's  $d$ , Pearson's  $r$ ), indicating how they were calculated
- Clearly defined error bars  
*State explicitly what error bars represent (e.g. SD, SE, CI)*

Our web collection on [statistics for biologists](#) may be useful.

### Software and code

Policy information about [availability of computer code](#)

Data collection

Leica SP8 X WLL Confocal microscope was used for all data collection.

Data analysis

Bitplane Imaris version 9.2.1 was used for colocalization, spot tracking, and surface area calculation.

For manuscripts utilizing custom algorithms or software that are central to the research but not yet described in published literature, software must be made available to editors/reviewers upon request. We strongly encourage code deposition in a community repository (e.g. GitHub). See the Nature Research [guidelines for submitting code & software](#) for further information.

### Data

Policy information about [availability of data](#)

All manuscripts must include a [data availability statement](#). This statement should provide the following information, where applicable:

- Accession codes, unique identifiers, or web links for publicly available datasets
- A list of figures that have associated raw data
- A description of any restrictions on data availability

The full data supporting this article are available from the corresponding author upon reasonable request.

## Field-specific reporting

Please select the best fit for your research. If you are not sure, read the appropriate sections before making your selection.

Life sciences  Behavioural & social sciences  Ecological, evolutionary & environmental sciences

For a reference copy of the document with all sections, see [nature.com/authors/policies/ReportingSummary-flat.pdf](https://www.nature.com/authors/policies/ReportingSummary-flat.pdf)

## Life sciences study design

All studies must disclose on these points even when the disclosure is negative.

|                 |                                                                                                                                                                                                               |
|-----------------|---------------------------------------------------------------------------------------------------------------------------------------------------------------------------------------------------------------|
| Sample size     | Although no sample size calculation was done prior to experiments we aimed for sample sizes n=30-50 whenever possible. We are able to detect statistically different means and provide biological replicates. |
| Data exclusions | No data were excluded.                                                                                                                                                                                        |
| Replication     | At least wo biological replicates were used for each experiment.                                                                                                                                              |
| Randomization   | Randomization was performed at the time of the electroporation, which randomly distributes fertilized eggs into experimental groups.                                                                          |
| Blinding        | Blinding was not possible as a single person performed the experiments.                                                                                                                                       |

## Reporting for specific materials, systems and methods

### Materials & experimental systems

| n/a                                 | Involvement in the study                                        |
|-------------------------------------|-----------------------------------------------------------------|
| <input checked="" type="checkbox"/> | <input type="checkbox"/> Unique biological materials            |
| <input type="checkbox"/>            | <input checked="" type="checkbox"/> Antibodies                  |
| <input checked="" type="checkbox"/> | <input type="checkbox"/> Eukaryotic cell lines                  |
| <input checked="" type="checkbox"/> | <input type="checkbox"/> Palaeontology                          |
| <input type="checkbox"/>            | <input checked="" type="checkbox"/> Animals and other organisms |
| <input checked="" type="checkbox"/> | <input type="checkbox"/> Human research participants            |

### Methods

| n/a                                 | Involvement in the study                        |
|-------------------------------------|-------------------------------------------------|
| <input checked="" type="checkbox"/> | <input type="checkbox"/> ChIP-seq               |
| <input checked="" type="checkbox"/> | <input type="checkbox"/> Flow cytometry         |
| <input checked="" type="checkbox"/> | <input type="checkbox"/> MRI-based neuroimaging |

## Antibodies

|                 |                                                                                                                                                                                                                                                                                                                                                                                                                                                                    |
|-----------------|--------------------------------------------------------------------------------------------------------------------------------------------------------------------------------------------------------------------------------------------------------------------------------------------------------------------------------------------------------------------------------------------------------------------------------------------------------------------|
| Antibodies used | Rabbit Anti-HA (Abcam ab9110), mouse anti-pTyr (Millipore 4G10 Platinum anti-Phosphotyrosine, Sigma-Aldrich, Cat # 05-321x), rat anti-HA antibody (Roche 11-867-423-001), Polyclonal Rabbit anti-phospho-SMAD5 (Cell Signaling, 9516S, 1:250) , mouse anti-beta-galactosidase (Promega 23781 1:500)                                                                                                                                                                |
| Validation      | mouse anti-beta-galactosidase (Promega 23781 1:500) used in Gline et al., 2015, Polyclonal Rabbit anti-phospho-SMAD5 (Cell Signaling, 9516S, 1:250) validated in Supplemental Figure 7. rat anti-HA antibody (Roche 11-867-423-001), cited in Jung et al., 2015 mouse anti-pTyr (Millipore 4G10 Platinum anti-Phosphotyrosine, Sigma-Aldrich, Cat # 05-321x), validated in our Duolink PLA experiments Rabbit Anti-HA (Abcam ab9110), cited in Seitz et al., 2014. |

## Animals and other organisms

Policy information about [studies involving animals](#); [ARRIVE guidelines](#) recommended for reporting animal research

|                         |                                                                                                                                     |
|-------------------------|-------------------------------------------------------------------------------------------------------------------------------------|
| Laboratory animals      | The study did not involve laboratory animals                                                                                        |
| Wild animals            | This study did not involve wild animals.                                                                                            |
| Field-collected samples | Ciona robusta specimens were ordered from M-Rep, San Diego ( <a href="http://m-rep.com/index.htm">http://m-rep.com/index.htm</a> ). |
